# Supplementary material for: Non-line-of-sight synthesis and characterization of a conformal submicron-thick cationic polymer deposited on 2D and 3D substrates
Source: Royal Society of Chemistry journal article supplement (doi:10.1039/d3lf00256j), 2024-01-01
Supplement: d3lf00256j1.pdf [file d3lf00256j1.pdf]

## Supplementary information

### Non-Line-of-Sight Synthesis and Characterization of a Conformal Submicron-Thick Cationic Polymer Deposited on 2D and 3D Substrates

Hunter O. Ford,<sup>1</sup> Brian L. Chaloux,<sup>2</sup> Battogtokh Jugdersuren,<sup>3</sup> Xiao Liu,<sup>4</sup> Christopher A. Klug,<sup>2</sup> Joel B. Miller,<sup>5</sup> Xiaobing Zuo,<sup>6</sup> Michael W. Swift,<sup>7</sup> Michelle D. Johannes,<sup>7</sup> Jeffrey W. Long,<sup>2</sup> Debra R. Rolison<sup>2\*</sup> and Megan B. Sassin<sup>2\*</sup>

\*Corresponding Authors: E-mail: [megan.sassin@nrl.navy.mil](mailto:megan.sassin@nrl.navy.mil); [debra.rolison@nrl.navy.mil](mailto:debra.rolison@nrl.navy.mil)

<sup>1</sup> NRL–NRC Postdoctoral Associate in the Chemistry Division, U.S. Naval Research Laboratory, Washington, DC 20375, USA

<sup>2</sup> Chemistry Division, U.S. Naval Research Laboratory, Washington, DC 20375, USA

<sup>3</sup> Jacobs Engineering Group, Hanover, MD 21076, USA

<sup>4</sup> Acoustics Division, U.S. Naval Research Laboratory, Washington, DC 20375, USA

<sup>5</sup> Emeritus, Chemistry Division, U.S. Naval Research Laboratory, Washington, DC 20375, USA

<sup>6</sup> X-ray Science Division, Argonne National Laboratory, Lemont, IL 60439, USA

<sup>7</sup> Materials Science & Technology Division, U.S. Naval Research Laboratory, Washington, DC 20375, USA

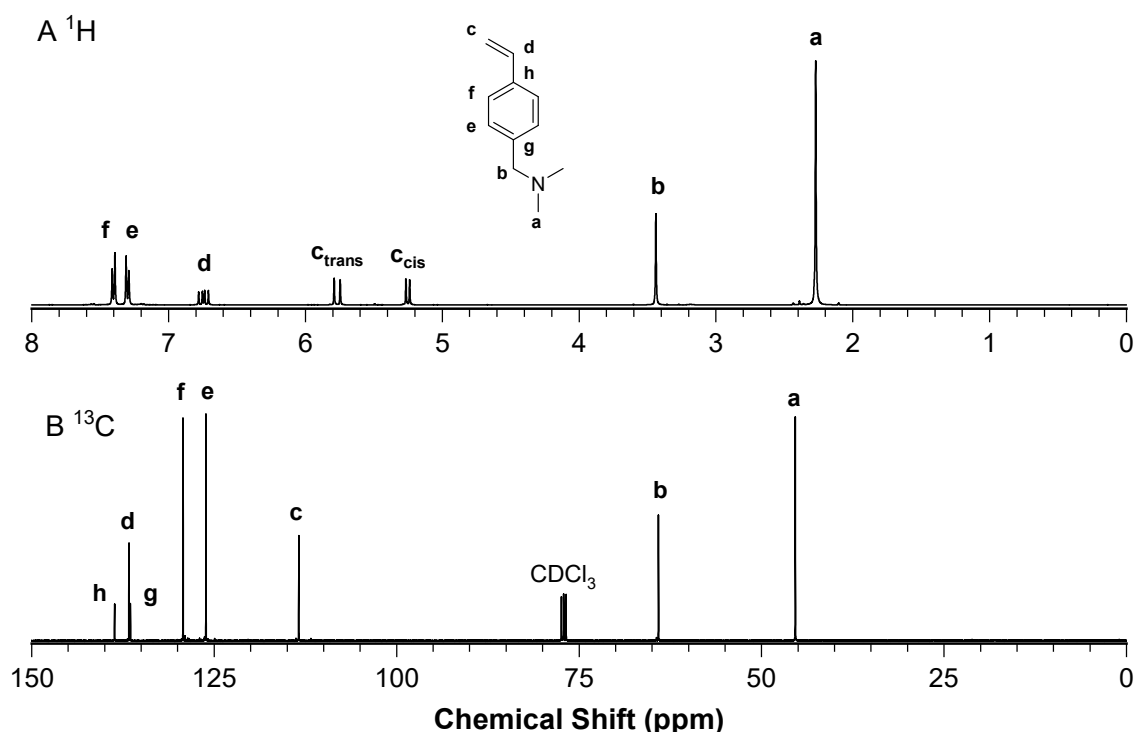

Fig. S1 NMR spectra of 4-dimethylaminomethylstyrene in CDCl<sub>3</sub>: (A) <sup>1</sup>H and (B) <sup>13</sup>C.

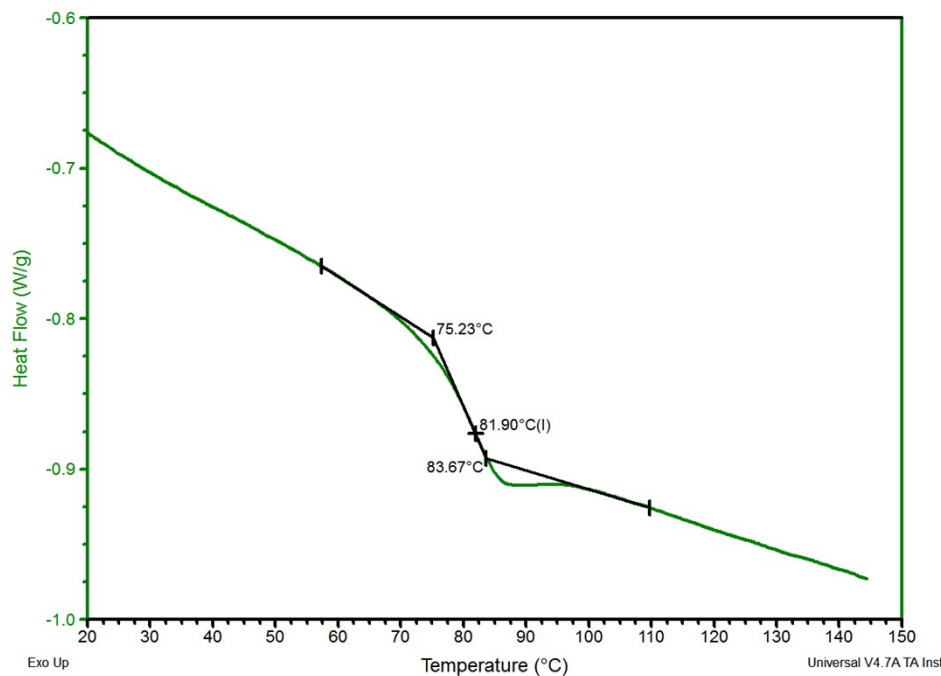

**Fig. S2** Differential scanning calorimetry heating curve ( $20\text{K min}^{-1}$ ) of pDMAMS prepared from neat free radical polymerization of DMAMS with AIBN at  $100^\circ\text{C}$ , with calculation of  $T_g$  ( $82^\circ\text{C}$ ) as the inflection point in the second-order thermal transition.

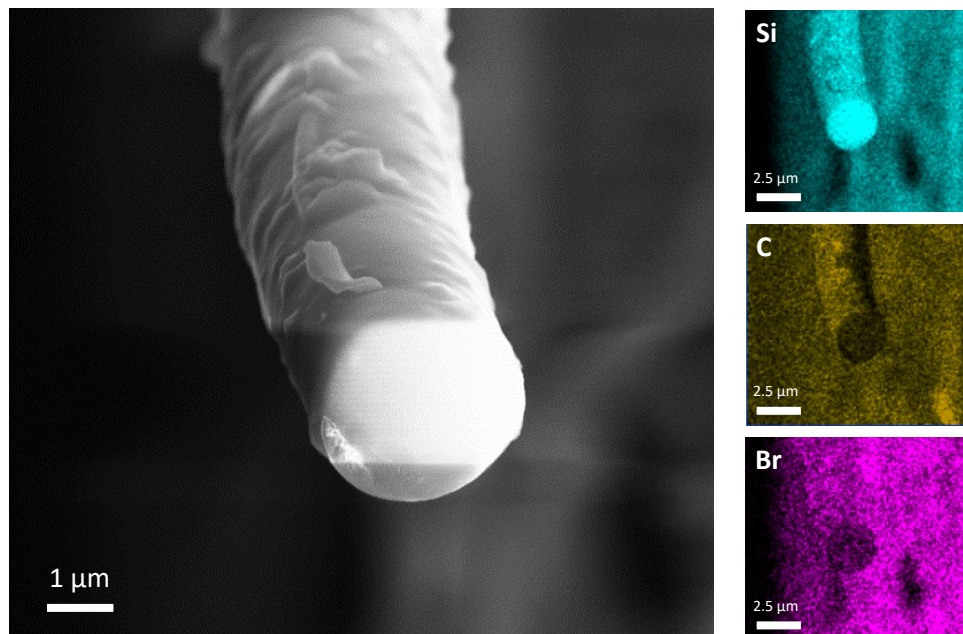

**Fig. S3** SEM–EDX images of silica fiber paper coated with pDMAMS<sup>+</sup>. The bright Si and diminished C/Br signal at the shorn fiber cross-section and the inverse along the length of the fiber indicate conformal coating.

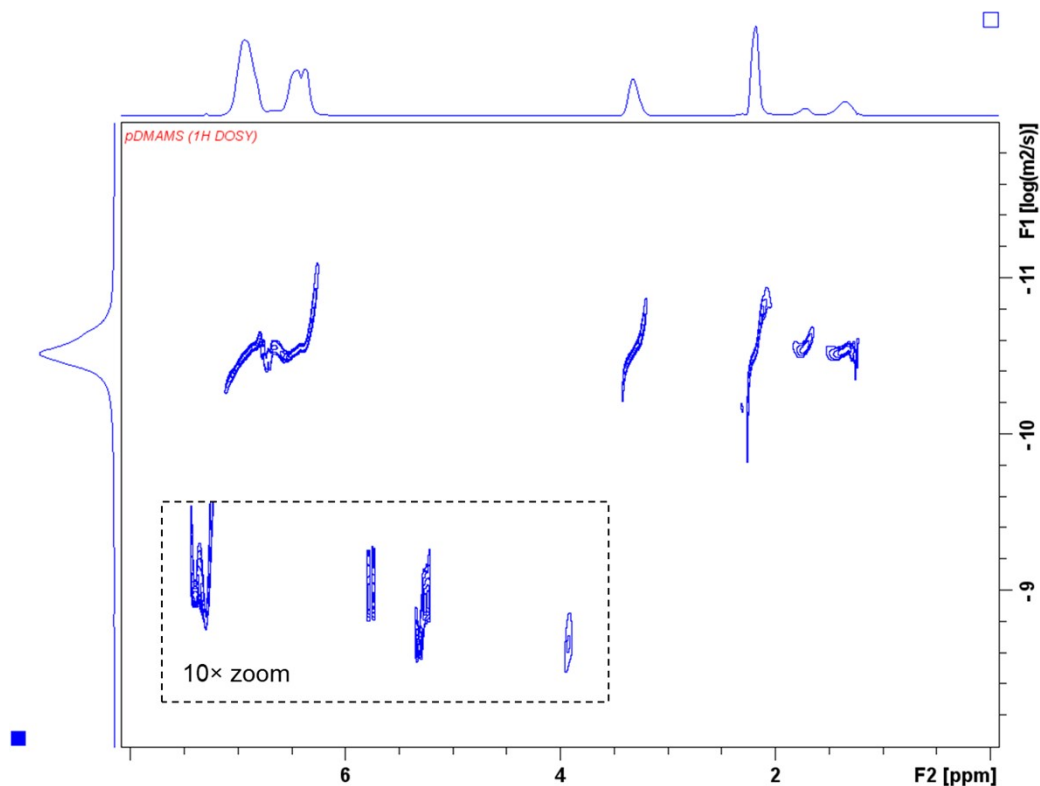

**Fig. S4**  $^1\text{H}$  DOSY pseudo-2D NMR spectrum of bulk-synthesized pDMAMS dissolved in  $\text{CDCl}_3$ . Inset is zoomed in to show peaks for  $\text{CHCl}_3$  and residual monomer, which are significantly weaker than the polymer peaks.

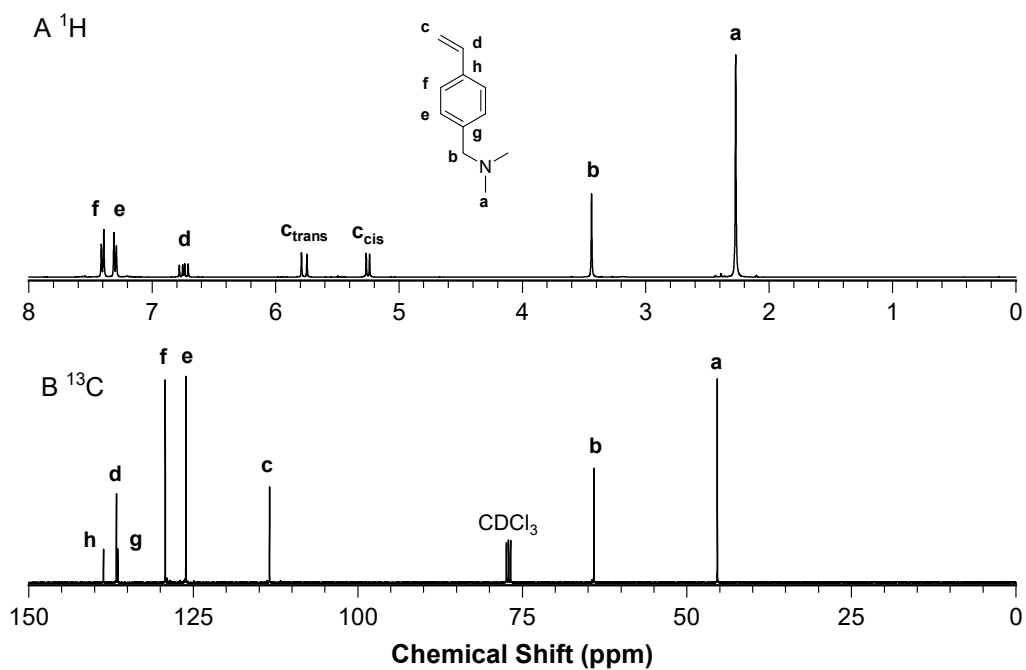

**Fig. S5** (A)  $^1\text{H}$  and (B)  $^{13}\text{C}$  NMR spectra of pDMAMS prepared from neat free-radical polymerization of DMAMS with AIBN at  $100^\circ\text{C}$ . Trace monomer (<1 mol%) is visible in the  $^1\text{H}$  NMR spectrum.

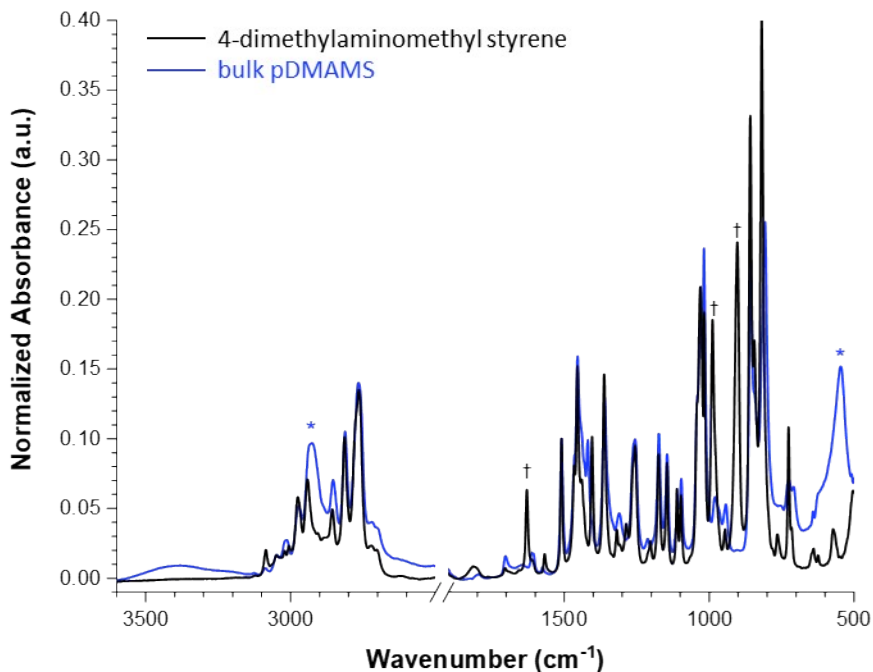

**Fig. S6** Overlaid ATR-FTIR spectra of 4-dimethylaminomethylstyrene (DMAMS monomer, black) and bulk-synthesized pDMAMS (blue) with intensities normalized to the peak at  $1510\text{ cm}^{-1}$ , which remains invariant over the course of polymerization. Features present in pDMAMS but not in the monomer are annotated with a blue asterisk (\*) while those present in DMAMS but not the polymer are annotated with a black dagger (†).

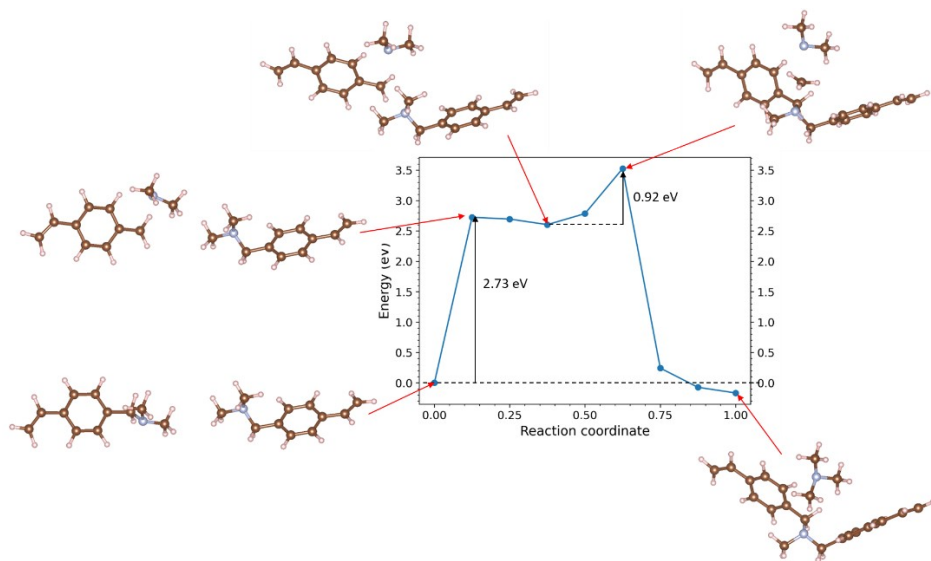

**Fig. S7** Density functional theory calculations and associated structures detailing potential annealing-induced cross-linking reactions.

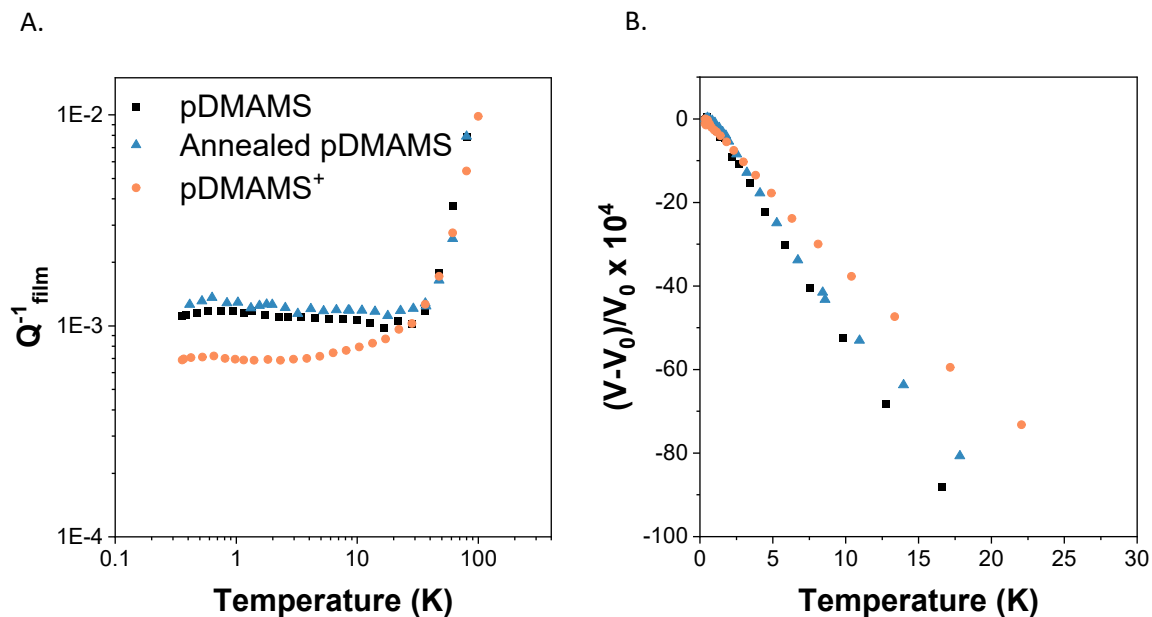

**Fig. S8** Mechanical properties of pDMAMS in the as-deposited, annealed, and alkylated states. (A) Film loss/internal friction ( $Q^{-1}$ ); (B) relative change in the speed of sound.

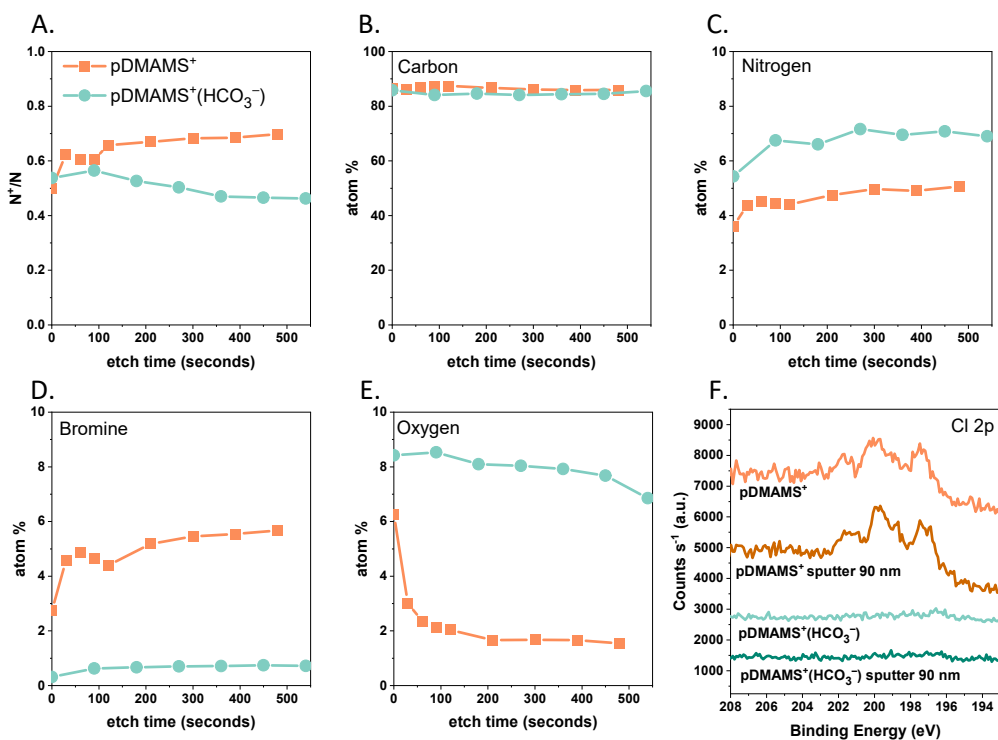

**Fig. S9** XPS depth-profiling results for different elements for pDMAMS<sup>+</sup> and pDMAMS<sup>+</sup>(HCO<sub>3</sub><sup>-</sup>). (A) ratio of quaternary ammonium  $N^+$  to amine N (measurement of functionalization); (B) Carbon; (C) Nitrogen; (D) Bromine; (E) Oxygen; (F) Surface and 90 nm (500 s sputtered) Cl spectra.

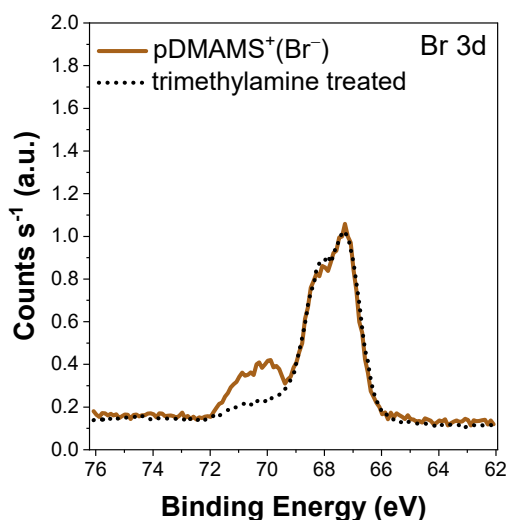

Fig. S10 XPS spectra of pDMAMS<sup>+</sup> and pDMAMS<sup>+</sup> treated with trimethylamine.

Table S1 Atomic percentages as determined via XPS for various pDMAMS compositions.

| Sample                                                  | Atomic %      |               |                            |               |               |                            |                | % N<br>as<br>N <sup>+</sup> | % Br<br>as<br>Br <sup>-</sup> |
|---------------------------------------------------------|---------------|---------------|----------------------------|---------------|---------------|----------------------------|----------------|-----------------------------|-------------------------------|
|                                                         | C<br>(286 eV) | N<br>(399 eV) | N <sup>+</sup><br>(402 eV) | O<br>(530 eV) | Br<br>(69 eV) | Br <sup>-</sup><br>(67 eV) | Cl<br>(200 eV) |                             |                               |
| pDMAMS                                                  | 81.80         | 3.24          | —                          | 14.80         | —             | —                          | —              | —                           | —                             |
| pDMAMS <sup>+</sup>                                     | 88.30         | 1.64          | 3.06                       | 3.61          | 0.46          | 2.40                       | 0.50           | 65.1                        | 83.9                          |
| pDMAMS <sup>+</sup> (Br <sup>-</sup> )                  | 87.83         | 1.65          | 3.09                       | 3.64          | 0.56          | 2.29                       | 0.90           | 65.1                        | 80.3                          |
| pDMAMS <sup>+</sup> (Br <sup>-</sup> )<br>amine treated | 88.64         | 1.88          | 3.51                       | 3.24          | 0.27          | 2.47                       | —              | 65.3                        | 90.1                          |
| pDMAMS <sup>+</sup> (HCO <sub>3</sub> <sup>-</sup> )    | 83.00         | 3.73          | 2.86                       | 10.30         | —             | —                          | —              | 43.4                        | —                             |

Calculation of IEC (ion exchange capacity in mEq g<sup>-1</sup>)

$$IEC = DF * \frac{1000 \text{ mmol}}{MW_{\text{monomer}} + \frac{MW_{\text{alkyl halide}}}{\#FG}} \quad \text{EQ. S1}$$

where:

**MW<sub>monomer</sub>** = molecular weight of the monomer (e.g., DMAMS = 161.25 g mol<sup>-1</sup>)

**DF** (degree of functionalization) = fraction of monomers that have been quaternized (e.g., 95%)

**MW<sub>alkyl halide</sub>** = molecular weight of the quaternization agent (e.g., 1-bromo-3-chloropropane = 157.44 g mol<sup>-1</sup>)

**#FG** (number of functional groups) = number of reactive groups (e.g., halides) per quaternization agent (e.g., 1-bromo-3-chloropropane = 2)

### Calculation of cross-linking density

For pDMAMS<sup>+</sup>(Br<sup>-</sup>). Known: 65.1% N is N<sup>+</sup>, 80.3% Br is Br<sup>-</sup>. Assume basis of 100 nitrogens. For simplicity, treat Cl as Br as it behaves the same way chemically. Set up system of equations where x is the number of cross-links, y is the number of monolinks. Each cross-link has two N<sup>+</sup> and two Br<sup>-</sup>. Each monolink (assuming one halide reacts with N and the other halide remains attached to the other end of the propyl group) contains one N<sup>+</sup>, one Br<sup>-</sup> and one Br.

System of equations to solve:

$$65 = 2x + y \quad \text{EQ. S2A}$$

(Number of N<sup>+</sup> must add to 65 assuming a 100 N basis)

$$0.197 = y/(2y + 2x) \quad \text{EQ. S2B}$$

(the percentage of Br relative to Br + Br<sup>-</sup> must be 19.7%)

Solving yields x = 24.5 and y = 15.9.

Therefore, roughly 49% of all N (and therefore 49% of all DMAMS monomers) are participating in a cross-link as N<sup>+</sup>. ~16% of N is in a monolink as N<sup>+</sup>, and 35% of N remains as an amine.

From these calculations, for every mol of N in the polymer film, 0.4 mol of 1-chloro-3-bromopropane is reacted into the film, with 0.24 mol of 1-chloro-3-bromopropane reacting at both ends, 0.16 mol reacting at only one end.

## Additional GISAXS/GIWAXS figures, equations, and modeling results

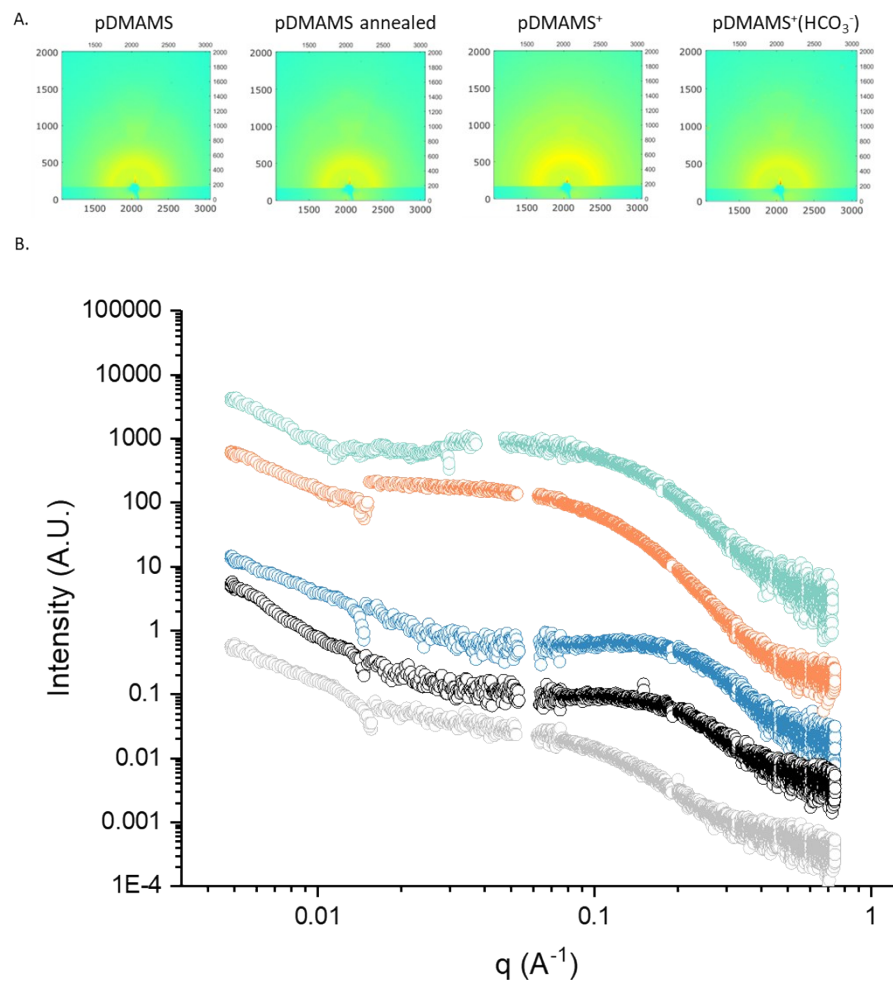

**Fig. S11** (A) 2D GIWAXS patterns of various pDMAMS films. (B) 1D vertical slice GISAXS spectra taken from 2D GISAXS patterns in Fig. 6.



**Table S2** Structure-independent multi-level unified fit model parameters for fit GISAXS spectra.

| Sample                                               | $G_1$<br>( $\text{cm}^{-1}$ ) | $R_{g1}$<br>(nm) | $P_1$ | $B_1$<br>( $\text{cm}^{-1}$ ) | $G_2$ | $R_{g2}$<br>(nm) | $P_2$ | $B_2$<br>( $\text{cm}^{-1}$ ) | background |
|------------------------------------------------------|-------------------------------|------------------|-------|-------------------------------|-------|------------------|-------|-------------------------------|------------|
| pDMAMS                                               | 10568                         | 81.3             | 2.6   | 4.8E-3                        | 6.2   | 3.5              | 2     | 1.2E-2                        | 1.85       |
| Annealed pDMAMS                                      | 2185                          | 65.7             | 2.1   | 3.8E-3                        | 0.07  | 1.5              | 1.7   | 2.3E-2                        | 1.00       |
| pDMAMS <sup>+</sup>                                  | 8195                          | 48.1             | 2.59  | 7.6E-3                        | 99.0  | 10.5             | 3.76  | 4.5E-5                        | 1.80       |
| pDMAMS <sup>+</sup> (HCO <sub>3</sub> <sup>-</sup> ) | 3143                          | 99.0             | 1.69  | 4.0E-2                        | 42.0  | 7.3              | 3.2   | 2.5E-4                        | 0.70       |

$$I(Q) = \sum_{i=1}^n \left( G_i \exp\left(-\frac{q^2 R_{g,i}^2}{3}\right) + B_i \exp\left(-\frac{q^2 R_{g,i+1}^2}{3}\right) \right) q_i^{* P_i} \quad \text{EQ. S3A}$$

$$q^* = \frac{q}{\left\{ \text{erf}\left(\frac{kqR_{g,i}}{\sqrt{6}}\right) \right\}} \quad \text{EQ. S3B}$$

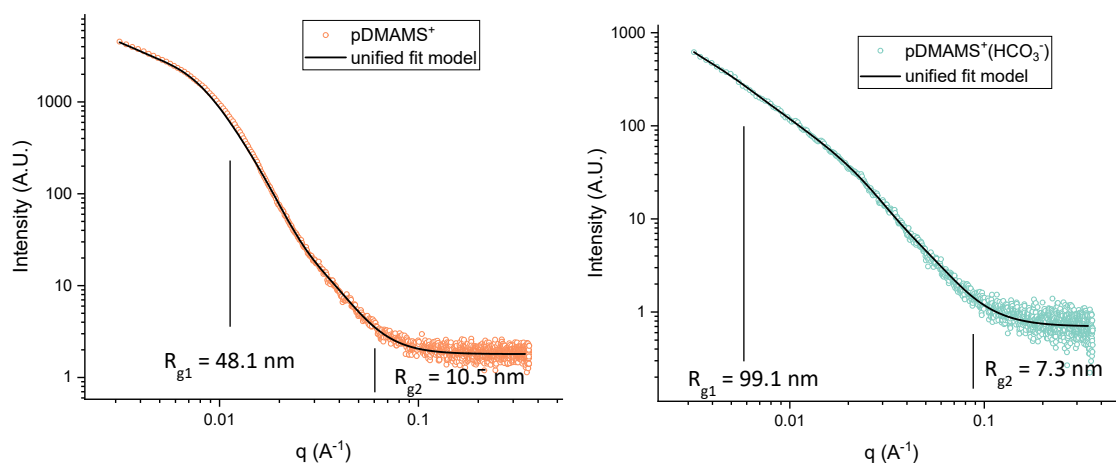

**Fig. S12** pDMAMS<sup>+</sup> and pDMAMS<sup>+</sup>(HCO<sub>3</sub><sup>-</sup>) GISAXS spectra and unified fit models with  $R_g$  length scales denoted.
